# Supplementary material
Source: publisher figshare collection journal article supplement (https://acs.figshare.com/ndownloader/files/22094841)
Supplement: Supplementary file 1 [file 22094841]

## **Supporting Information**

### **Seawater Desalination by Using MOF-Incorporated Cu-Based Alginate Beads without Energy Consumption**

Sang Joon Lee\*, Taeseong Hann, and Sung Ho Park

Department of Mechanical Engineering, Pohang University of Science and Technology, 77  
Cheongam-Ro, Nam-Gu, Pohang, Gyeongbuk, 790-784, South Korea

\*Corresponding author: (82)-054-279-2169; [sjlee@postech.ac.kr](mailto:sjlee@postech.ac.kr)

### **Keywords**

Seawater; desalination; metal-organic framework; adsorption; alginic acid

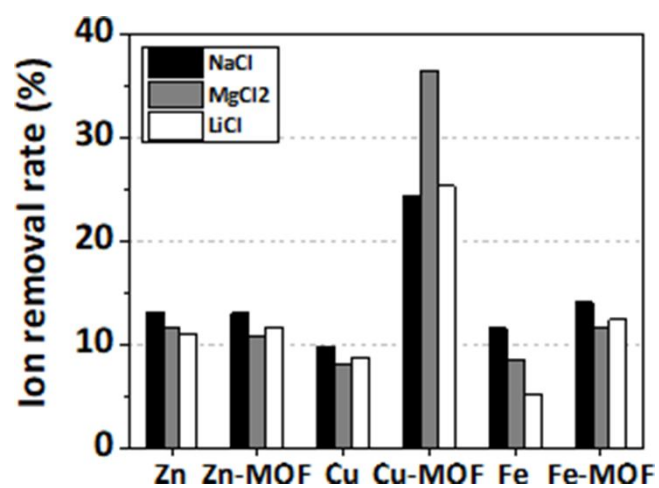

Figure S1. Comparison of the ion removal rates of three different metal ion-based alginate beads and their MOF-incorporated beads.

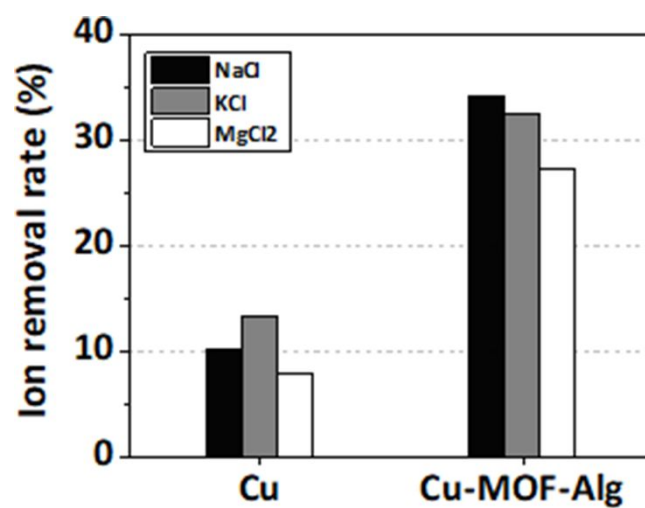

Figure S2. Comparison of the ion removal rates of the Cu-MOF-Alg beads for three different salt ions.

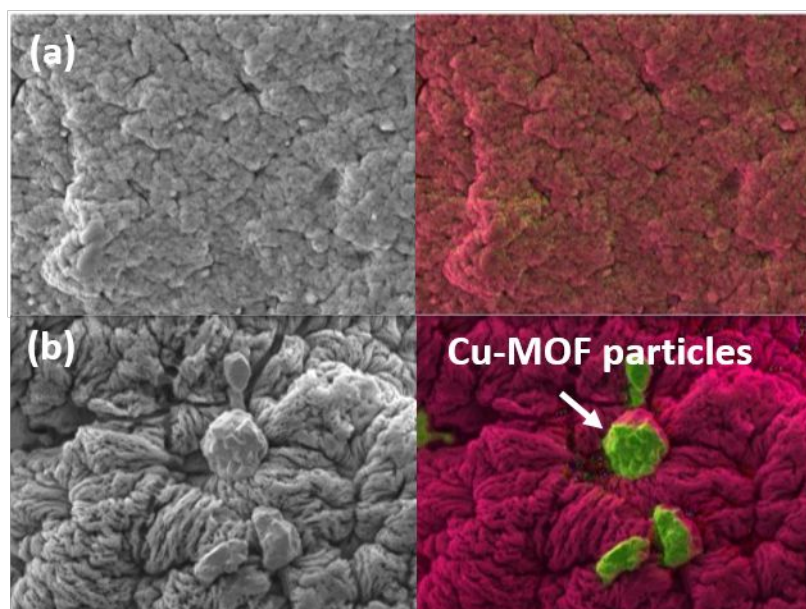

Figure S3. EDS mapping images of (a) Cu-Alg beads and (b) Cu-MOF-Alg beads.

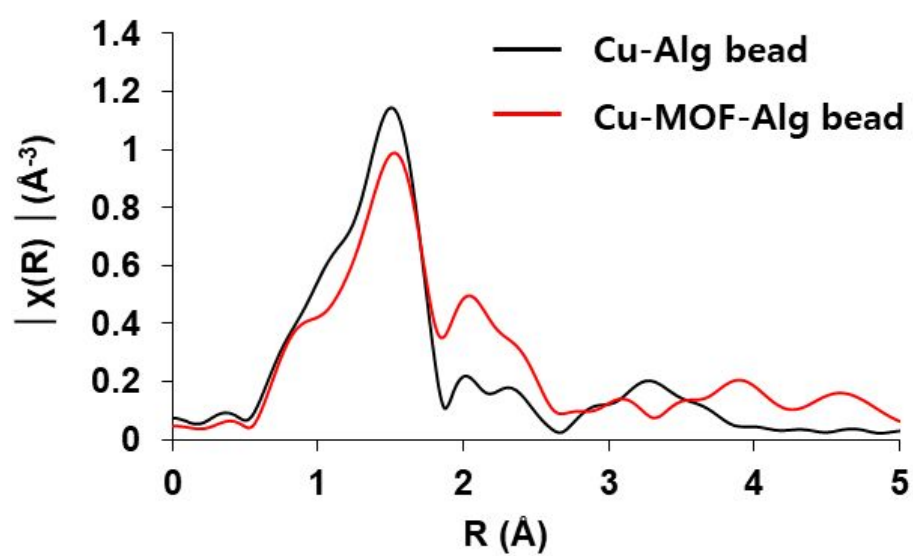

Figure S4. Comparison of EXAFS results of Cu-Alg and Cu-MOF-Alg beads
